# Supplementary material for: An AP Endonuclease Functions in Active DNA Demethylation and Gene Imprinting in Arabidopsis
Source: PubMed Central journal article supplement (PMC4287435; doi:10.1371/journal.pgen.1004905), 2015-01-08

Figure S3

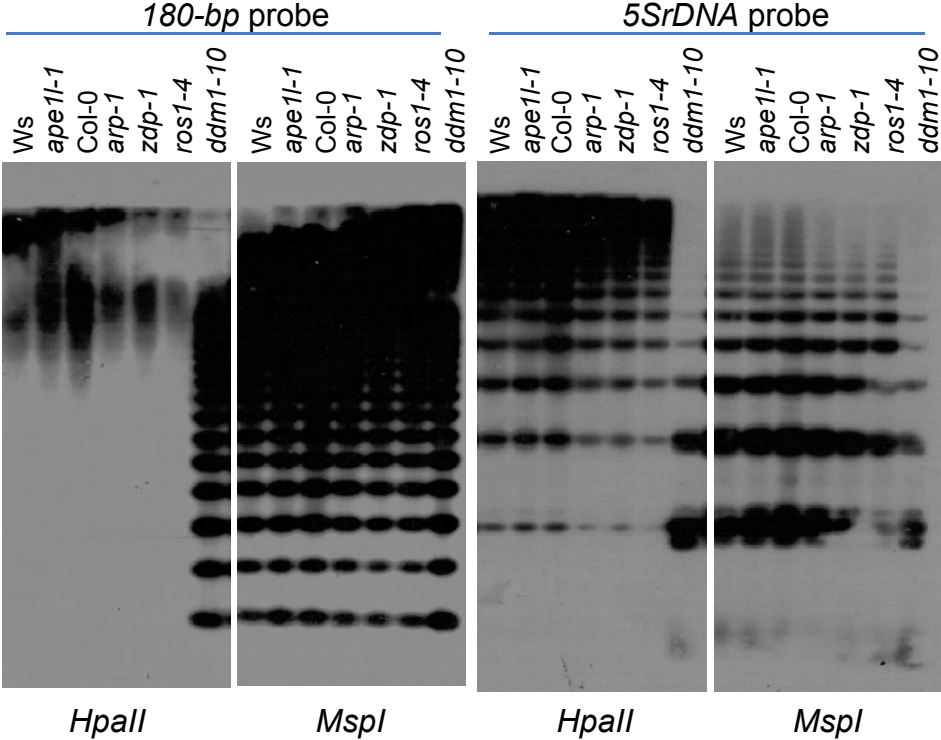

Supplement: pgen.1004905.s003.pdf [file pgen.1004905.s003.pdf]
