# Supplementary material for: An AP Endonuclease Functions in Active DNA Demethylation and Gene Imprinting in Arabidopsis
Source: PubMed Central journal article supplement (PMC4287435; doi:10.1371/journal.pgen.1004905), 2015-01-08

Figure S4

A

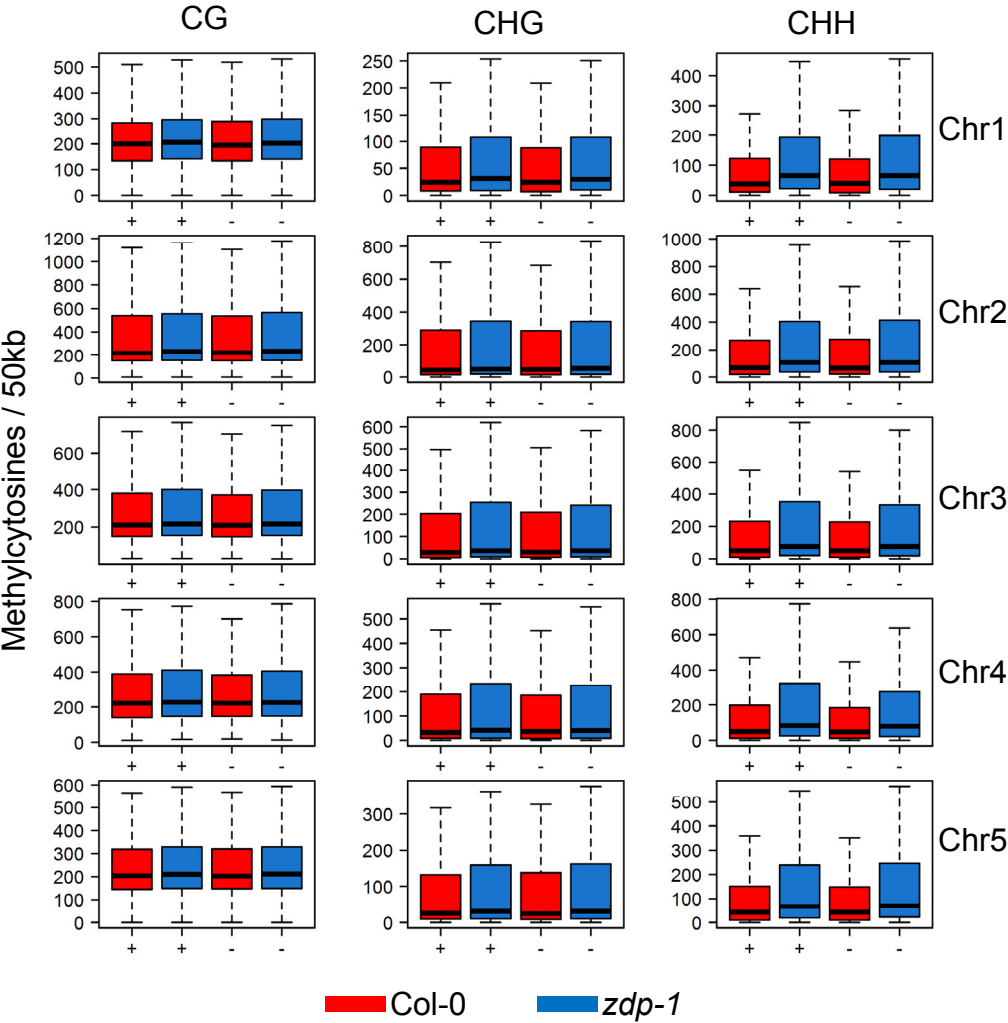

Figure S4 continued

B

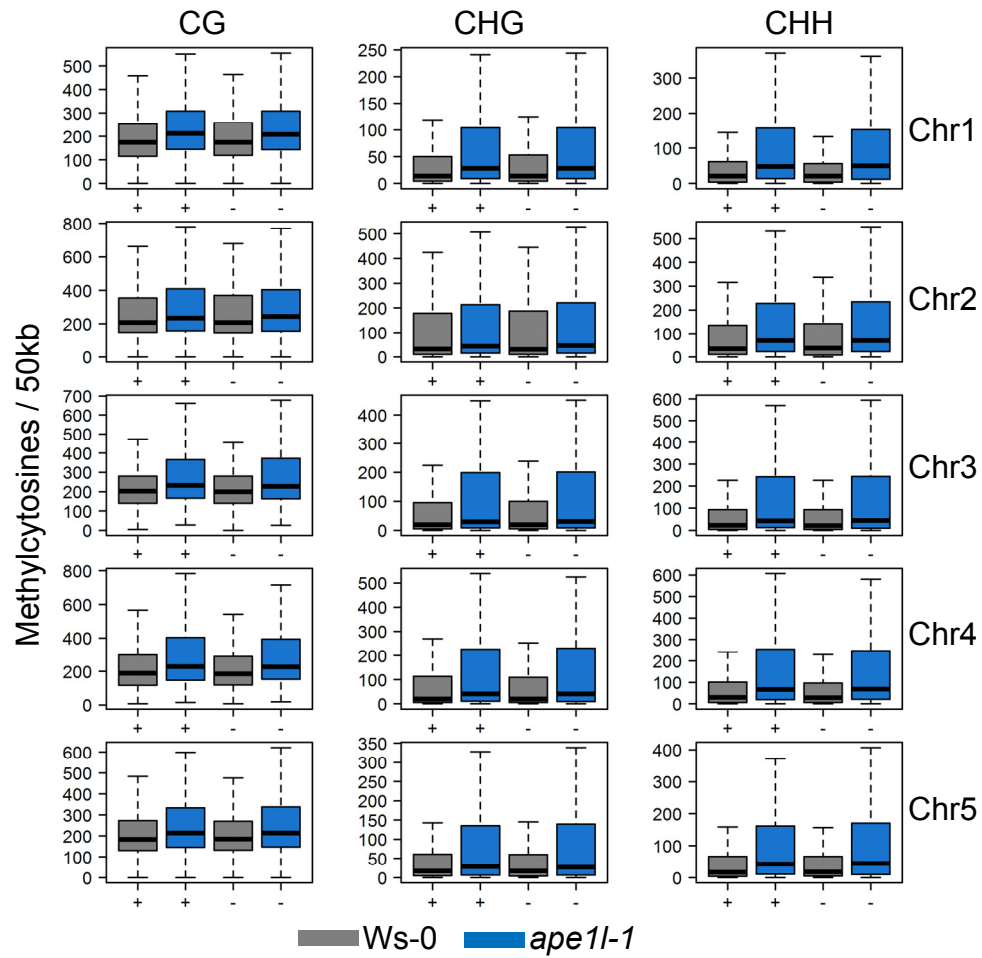

C

| Sample        | Hyper-DMRs | Hypo-DMRs | Overlap with <i>rdd</i> |
|---------------|------------|-----------|-------------------------|
| <i>rdd</i>    | 9967       | 991       |                         |
| <i>ros1-4</i> | 6622       | 646       | 74.7%                   |
| <i>zdp-1</i>  | 1559       | 612       | 70.9%                   |
| <i>ape1-1</i> | 3,497      | 2,892     | 46.7%                   |
| <i>arp-1</i>  | 162        | 241       | 80.2%                   |

Figure S4 continued

D

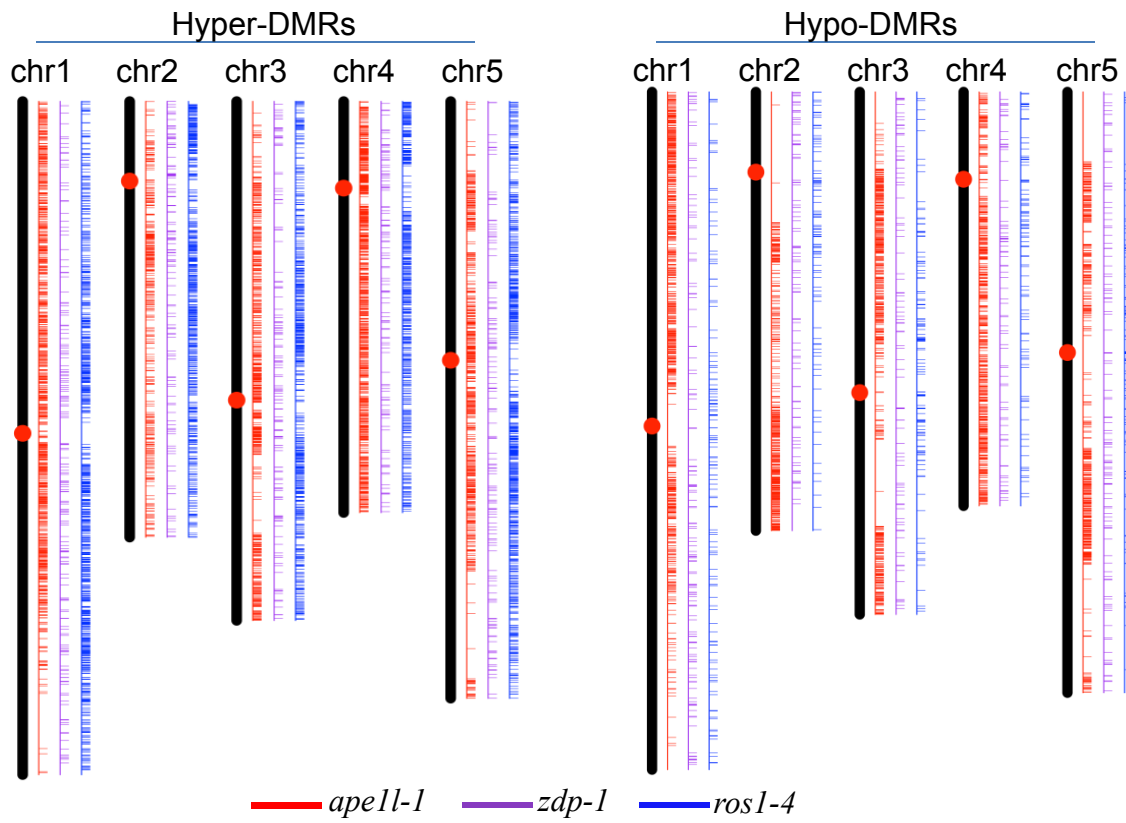

E

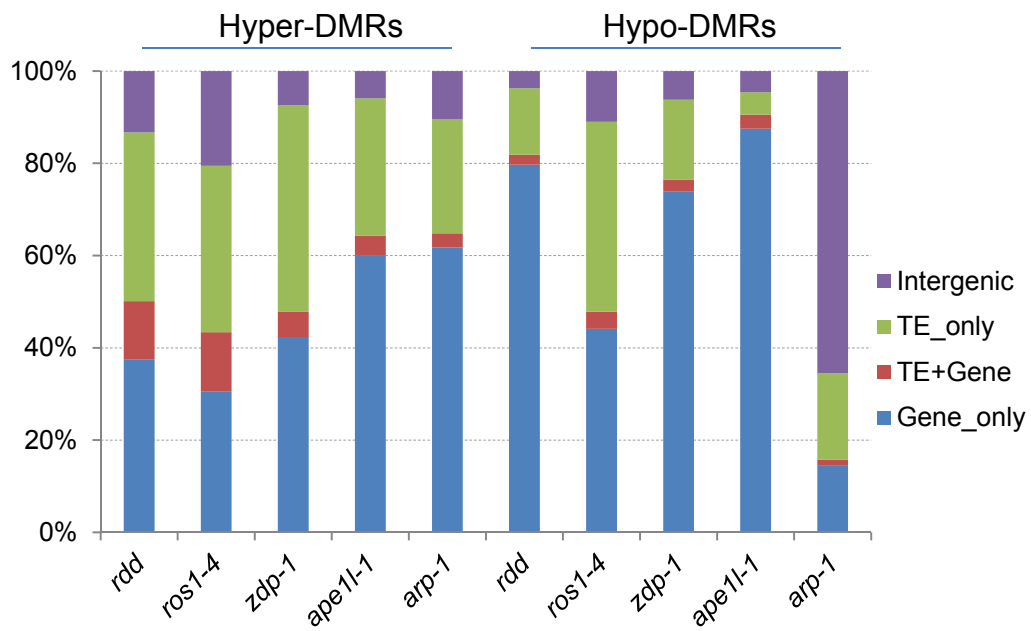

Supplement: pgen.1004905.s004.pdf [file pgen.1004905.s004.pdf]
